# Supplementary material
Source: Springer Nature journal article supplement (https://www.springermedizin.de/resource/supplementary/12887_2013_815_MOESM1_ESM.pdf/9476306)

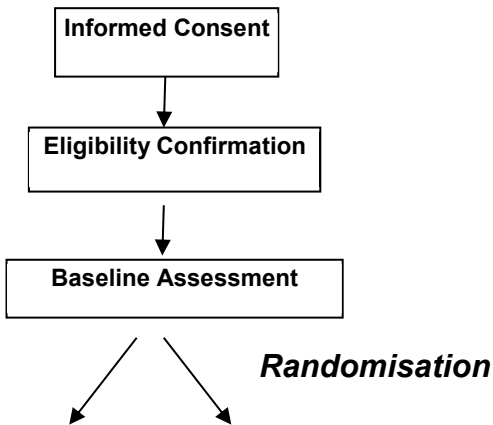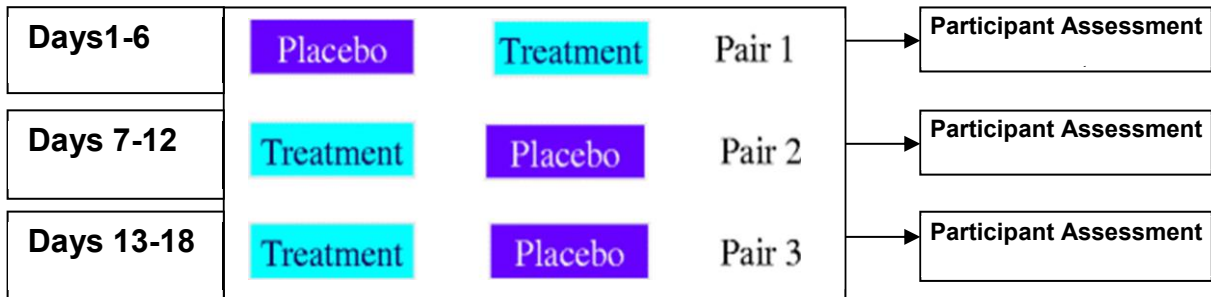

Supplement: MOESM1 [file 9476306]
